# Supplementary material for: Physical Enrichment Triggers Brain Plasticity and Influences Blood Plasma Circulating miRNA in Rainbow Trout (Oncorhynchus mykiss)
Source: MDPI journal article supplement (doi:10.3390/biology11081093), 2022-07-22
Supplement: s1 [file s1]

## SUPPLEMENTAL DATA AND FIGURES

### Physical enrichment triggers brain plasticity in rainbow trout (*Oncorhynchus mykiss*) and influence on blood plasma circulating miRNA

Emilie Cardona<sup>1,†</sup>, Valentin Brunet<sup>2,†</sup>, Elodie Baranek<sup>1</sup>, Léo Milhade<sup>3</sup>, Sandrine Skiba-Cassy<sup>1</sup>, Julien Bobe<sup>2</sup>, Ludovic Calandreau<sup>4</sup>, Jérôme Roy<sup>1,\*,†</sup> and Violaine Colson<sup>2,\*,†</sup>

<sup>1</sup>INRAE, Université de Pau et des Pays de l'Adour, E2S UPPA, UMR1419 Nutrition Metabolism and Aquaculture, Aquapôle, F-64310 Saint-Pée-sur-Nivelle, France; emilie.cardona@inrae.fr (E.C.); elodie.baranek@inrae.fr (E.B.); sandrine.skiba@inrae.fr (S.SC.); jerome.roy@inrae.fr (J.R.)

<sup>2</sup>INRAE, UR 1037, LPGP Fish Physiology and Genomics, Campus de Beaulieu, F-35042, Rennes, France; valentin.brunet@inrae.fr (V.B.); julien.bobe@inrae.fr (J.B.); violaine.colson@inrae.fr (V.C.)

<sup>3</sup>IRISA, INRIA, CNRS, Université de Rennes 1, F-35000, Rennes, France; leo.milhade@irisa.fr (L.M.)

<sup>4</sup>CNRS, IFCE, INRAE, Université de Tours, PRC, 37380 Nouzilly, France; ludovic.calandreau@inrae.fr (L.C.)

\* Correspondence: [violaine.colson@inrae.fr](mailto:violaine.colson@inrae.fr) / [jerome.roy@inrae.fr](mailto:jerome.roy@inrae.fr)

† These authors contributed equally to this work.

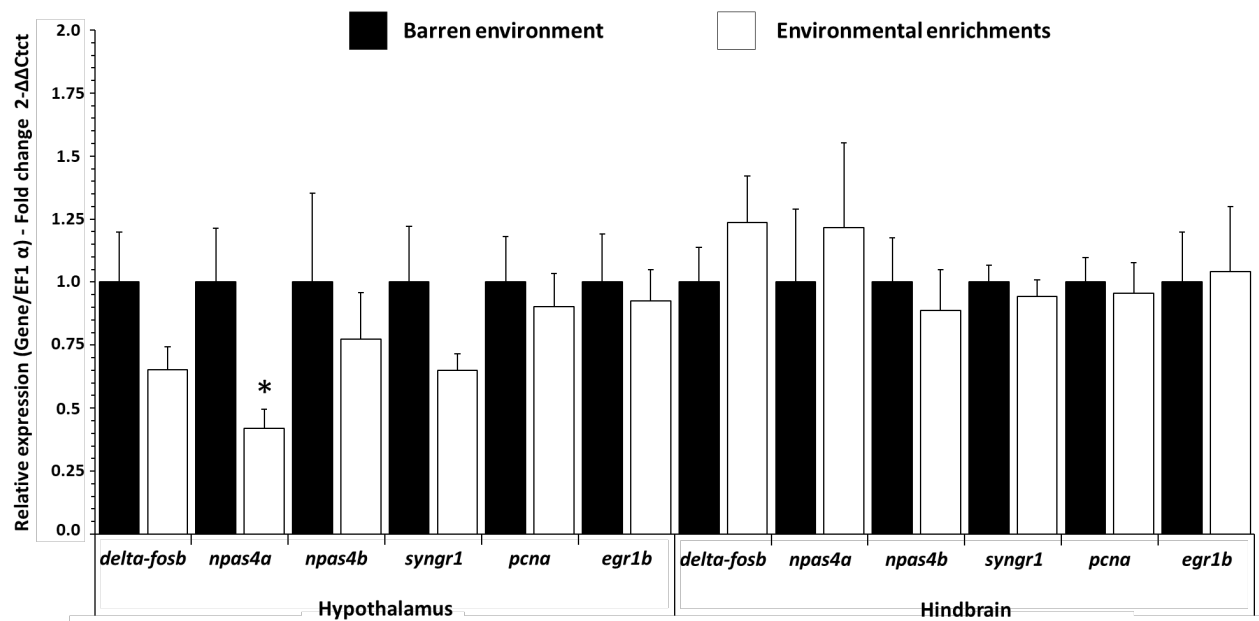

**Figure S1. Neuronal activity related mRNA level of transcripts in hypothalamus and hindbrain of RT raised in a barren environment (black) or environmental enrichment (white) during three months.** Values are expressed as group mean  $\pm$  SEM; fold change vs barren environment for all genes; welch's *t*-test, Tukey post hoc; Differences between treatments are represented by \* ( $P < .05$ ). Replicates ( $n = 8$ ) correspond to different individual fish.

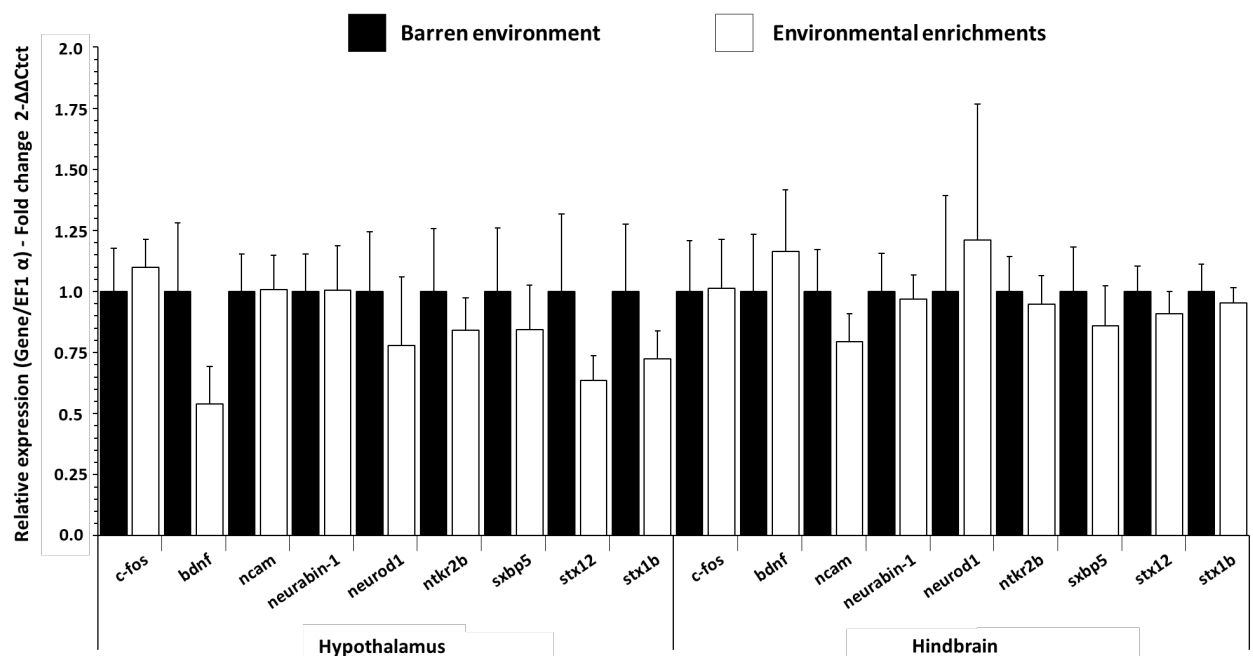

**Figure S2. Neurotrophic and synaptogenesis factors related mRNA level of transcripts in hypothalamus and hindbrain of RT raised in a barren environment (black) or environmental enrichment (white) during three months.** Values are expressed as group mean  $\pm$  SEM; fold change vs barren environment for all genes; welch's *t*-test, Tukey post hoc; Differences between treatments are represented by \* ( $P < .05$ ). Replicates ( $n = 8$ ) correspond to different individual fish.

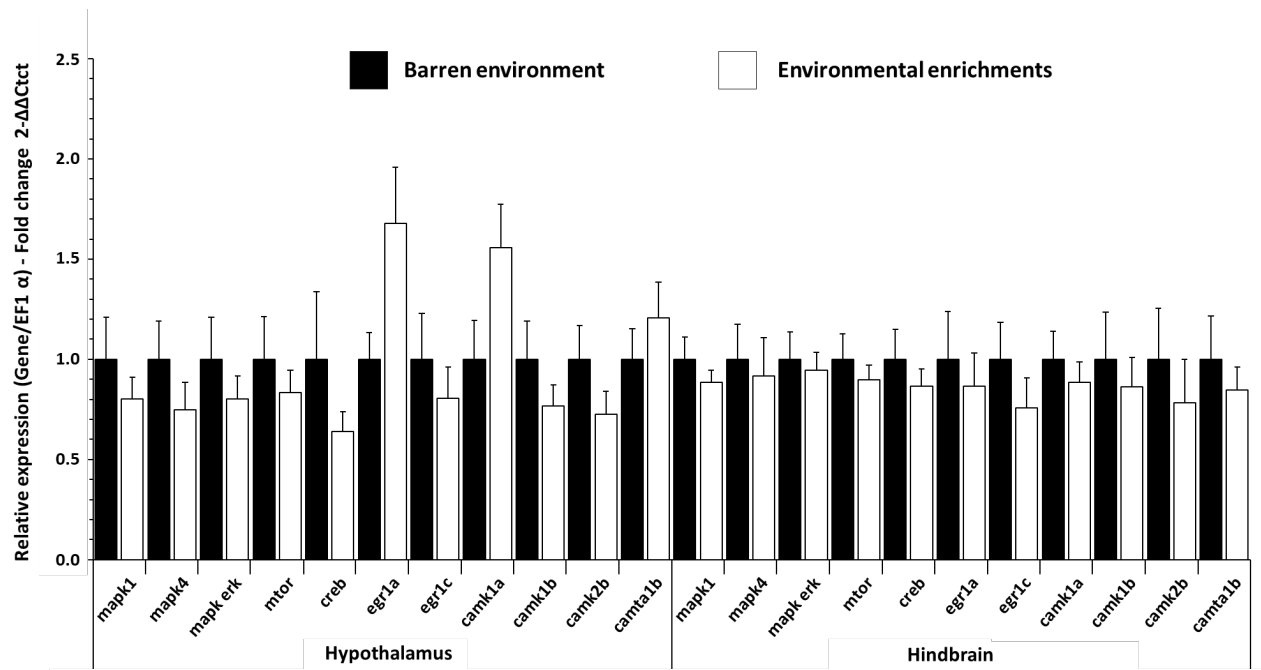

**Figure S3. Plasticity factors related mRNA level of transcripts in hypothalamus and hindbrain of RT raised in a barren environment (black) or environmental enrichment (white) during three months.** Values are expressed as group mean  $\pm$  SEM; fold change vs barren environment for all genes; welch's *t*-test, Tukey post hoc; Differences between treatments are represented by \*( $P < .05$ ). Replicates ( $n = 8$ ) correspond to different individual fish.

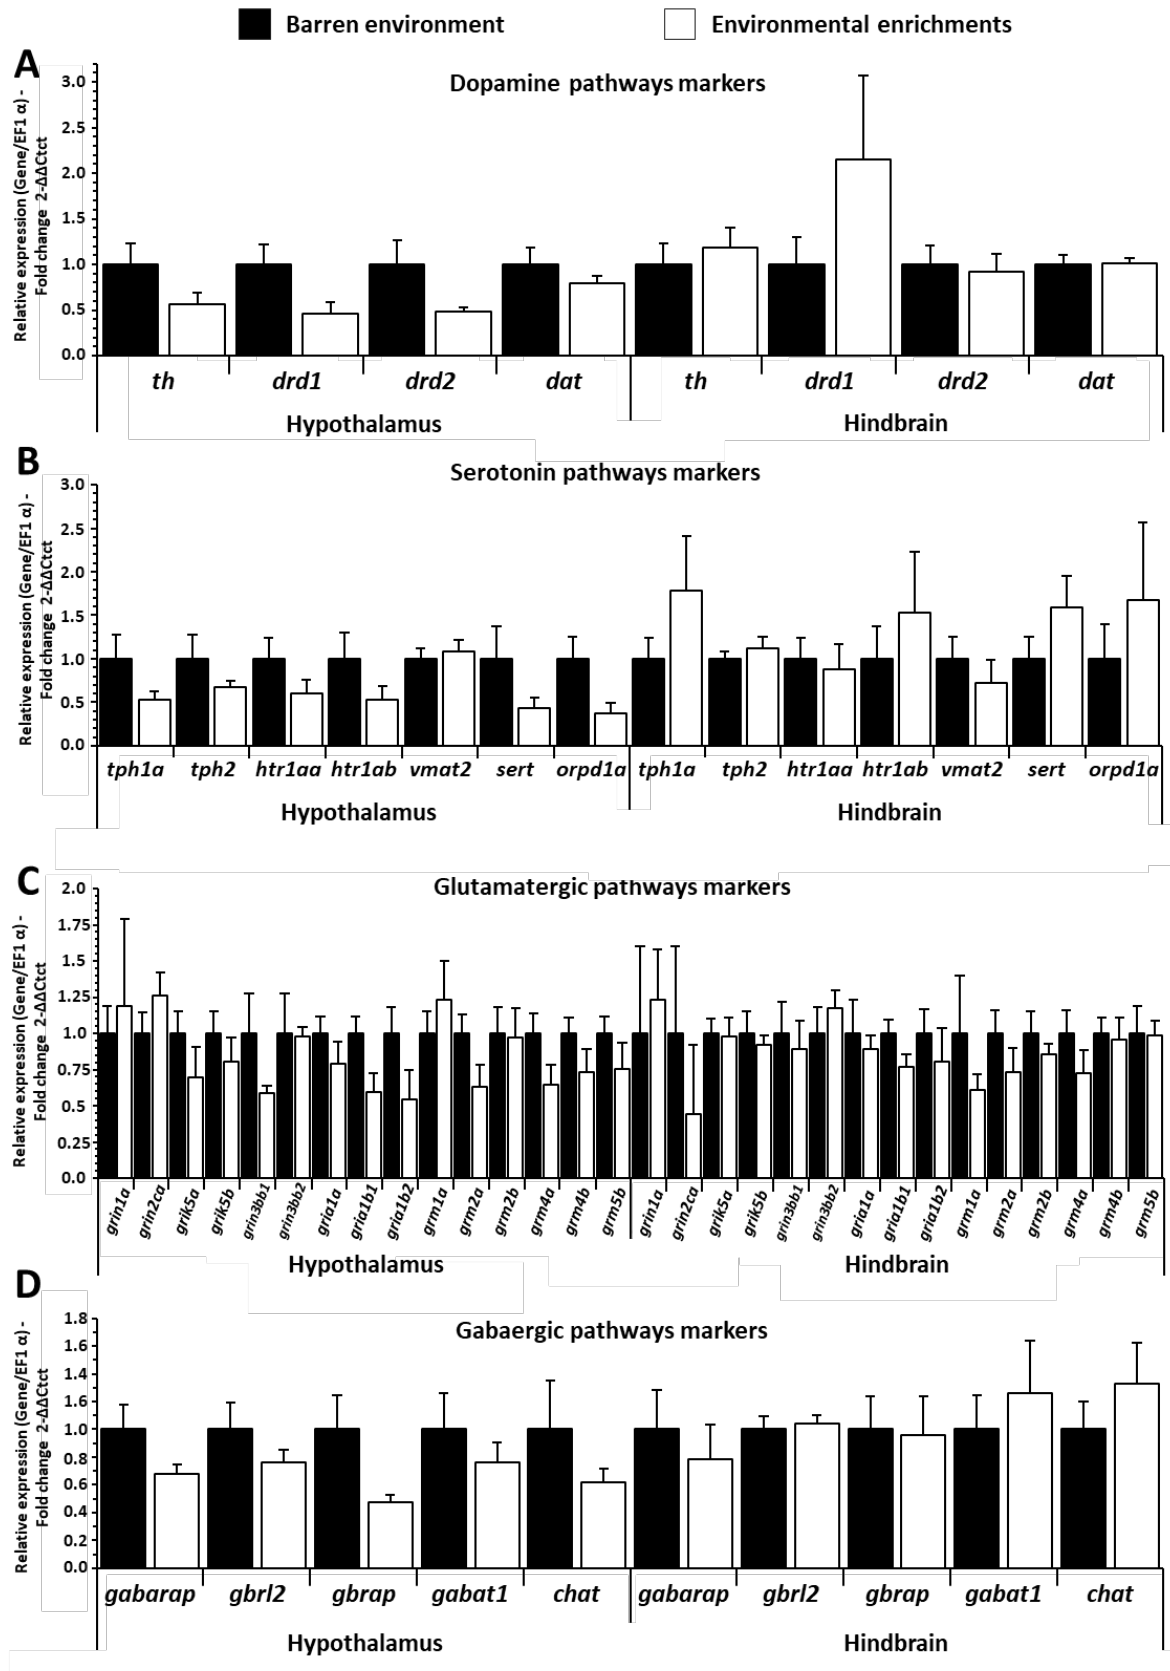

Figure S4. Dopamine, serotonin, glutamatergic and gabaergic pathways related mRNA level of transcripts in hypothalamus and hindbrain of RT raised in a barren environment (black) or environmental enrichment (white) during three months. Values are expressed as group mean  $\pm$  SEM; fold change vs barren environment for all genes; welch's *t*-test, Tukey post hoc; Differences between treatments are represented by \* ( $P < .05$ ). Replicates (N= 8) correspond to different individual fish.
